# Supplementary material for: Genetically mimicked effects of ASGR1 inhibitors on all-cause mortality and health outcomes: a drug-target Mendelian randomization study and a phenome-wide association study
Source: Springer Nature journal article supplement (doi:10.1186/s12916-023-02903-w), 2023-07-03
Supplement: MOESM1 [file 25568336]

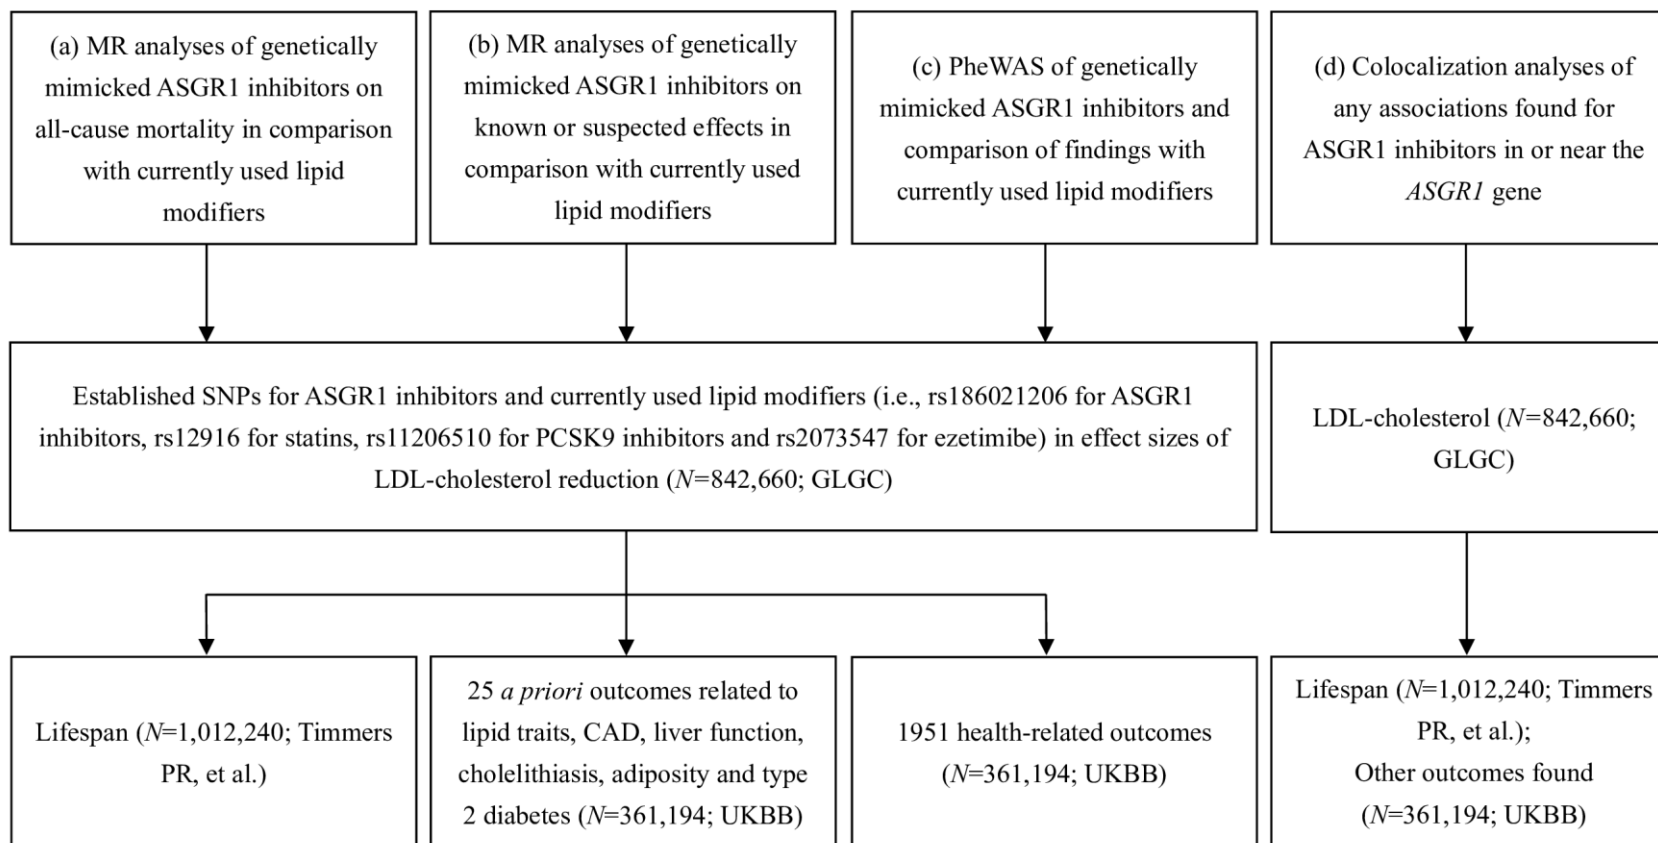

Supplemental Figure S1. Flowchart of the study design.

a. CAD, coronary artery disease; GLGC, Global Lipids Genetics Consortium; MR, Mendelian randomization; PheWAS, phenome-wide association study; UKBB, UK Biobank.

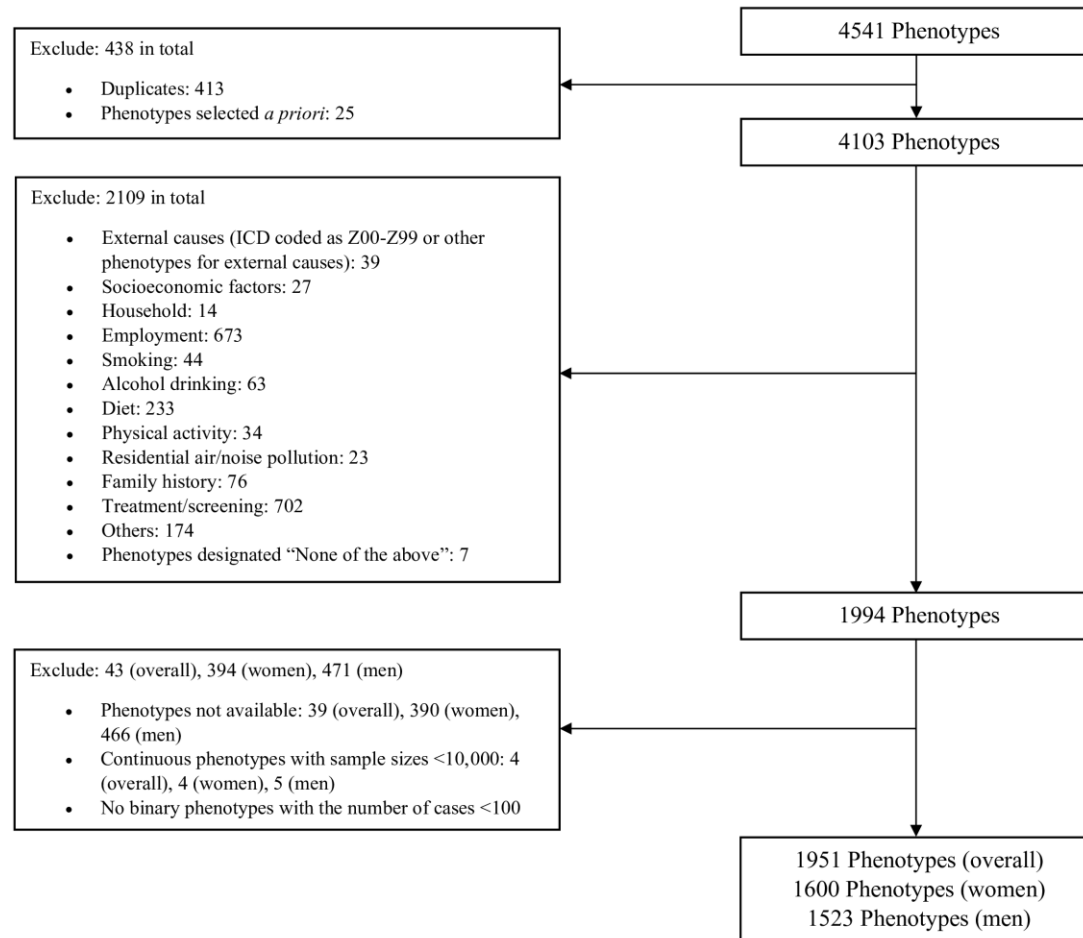

Others: Age, sex, reception, hospital administration, questionnaire/test completion, reaction time, skin/hair colour, congenital malformation, early life factors, sexual orientation, social activities, sun exposure, addiction, phone use, glasses wearing, heating, transportation, age at disease onset or diagnosis, age at death and underlying cause of death.

Supplemental Figure S2. Flowchart of phenotype selection for the phenome-wide association study using the UK Biobank summary statistics provided by Neale lab.

a. ICD, International Classification of Disease.

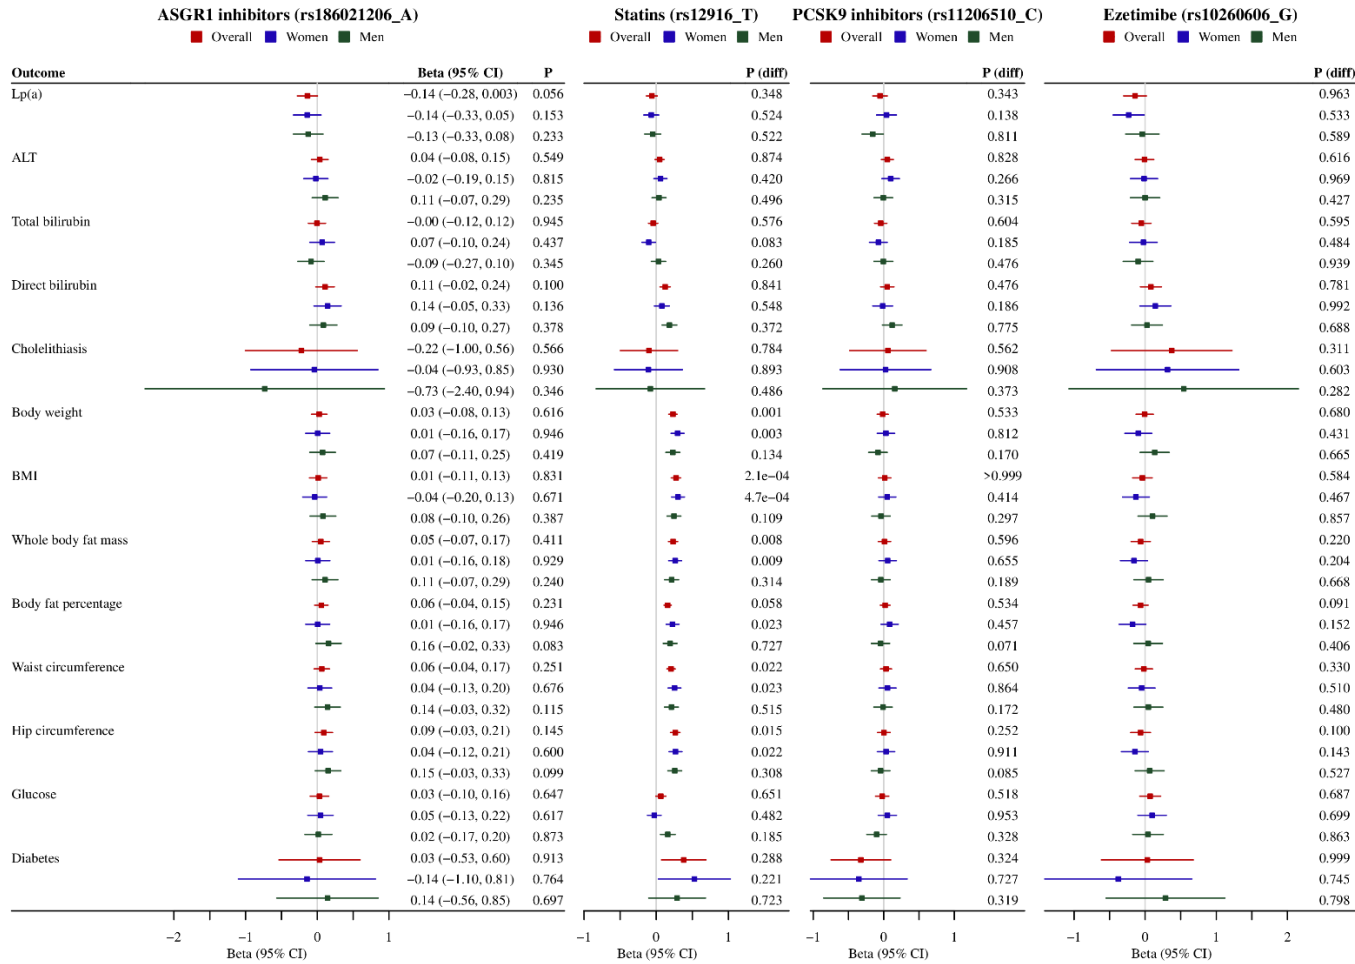

Supplemental Figure S3. Genetically mimicked effects of ASGR1 inhibitors on the 13 non-significant outcomes among 25 *a priori* health outcomes in comparison with currently used lipid modifiers.

a. ALT, alanine transaminase; BMI, body mass index; CI, confidence interval; Lp(a), lipoprotein(a).

b. P(diff) denotes the *p* value for the comparison of the associations of statins, PCSK9 inhibitors or ezetimibe with those of ASGR1 inhibitors.

c. The G allele of rs10260606 proxied the A allele of rs2073547 ( $r^2=0.99$ ).

d. Estimates are expressed in standard deviation (SD) for continuous outcomes, and in log odds for binary outcomes per SD decrease in LDL-cholesterol.

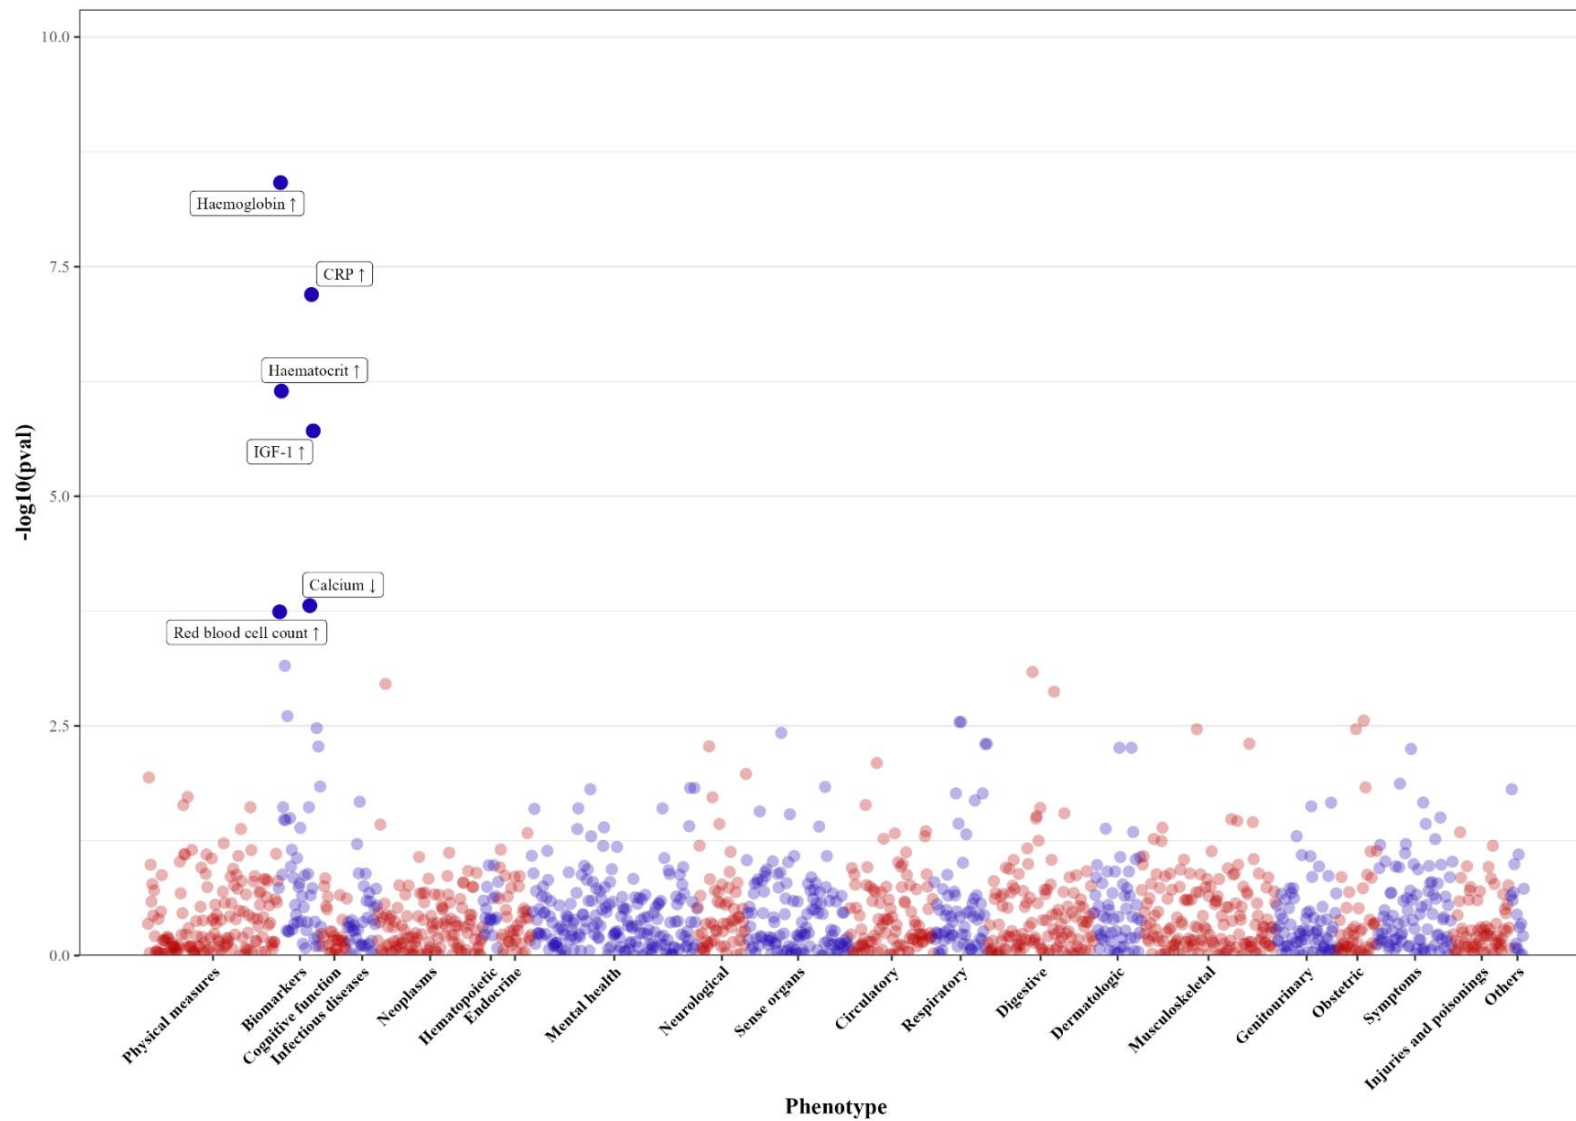

Supplemental Figure S4. Manhattan plot of genetically mimicked ASGR1 inhibitors (instrumented by the A allele of rs186021206) on 1600 phenotypes for women in the UK Biobank.

a. CRP, C-reactive protein; IGF-1, insulin-like growth factor 1.

b. Each significant phenotype corrected for multiple comparison is highlighted with a label, where ↑ denotes positive association and ↓ denotes negative association.

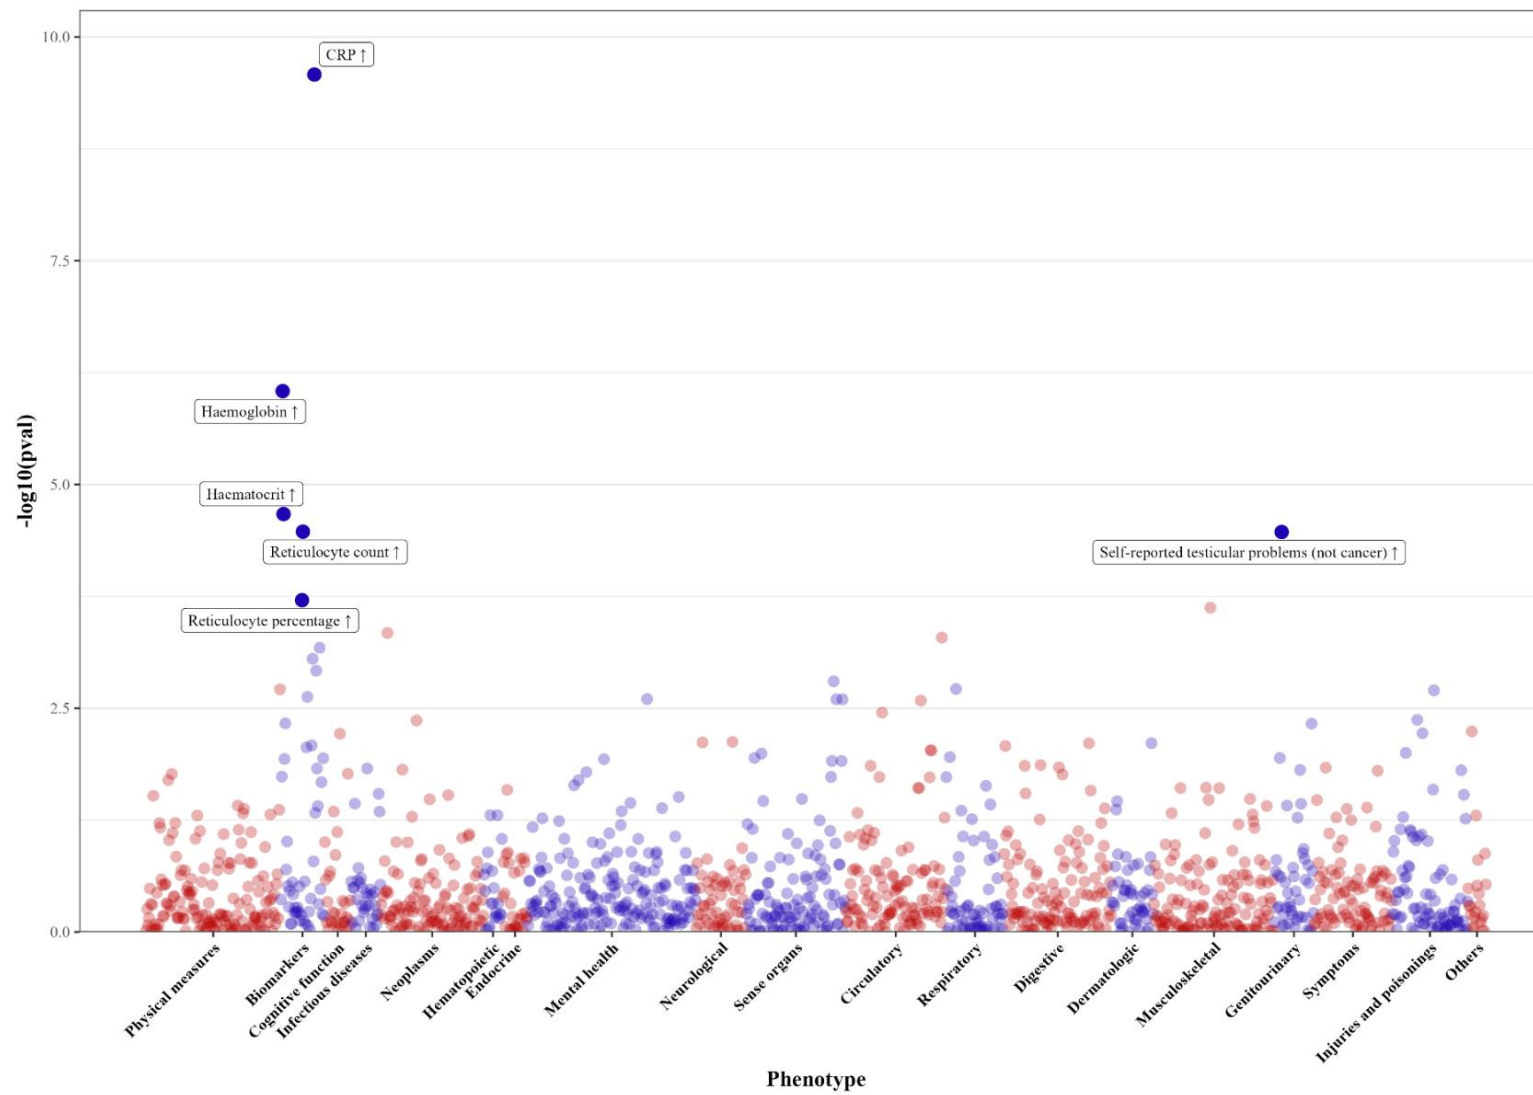

Supplemental Figure S5. Manhattan plot of genetically mimicked ASGR1 inhibitors (instrumented by the A allele of rs186021206) on 1523 phenotypes for men in the UK Biobank.

a. CRP, C-reactive protein.

b. Each significant phenotype corrected for multiple comparison is highlighted with a label, where ↑ denotes positive association and ↓ denotes negative association.

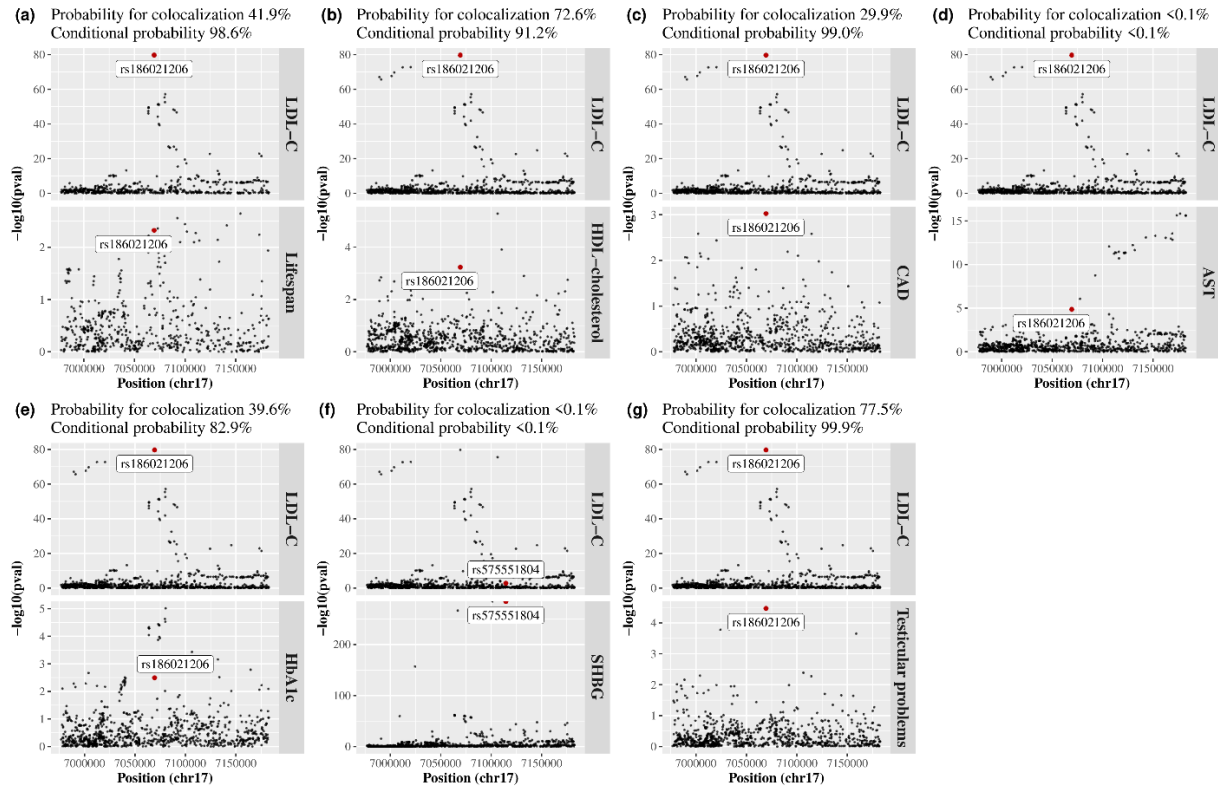

Supplemental Figure S6. Colocalization analyses for LDL-cholesterol and each significant outcome with probability for colocalization <0.80 in or near (+/-100kb) the *ASGR1* gene.

a. AST, aspartate aminotransferase; CAD, coronary artery disease; HbA1c, glycated haemoglobin; HDL, high-density lipoprotein; LDL, low-density lipoprotein; SHBG, sex hormone-binding globulin.

b. Prior probabilities were set to  $1.0 \times 10^{-4}$  for a variant associated with LDL-cholesterol,  $1.0 \times 10^{-4}$  for a variant associated with the outcome, and  $1.0 \times 10^{-5}$  for a variant associated with both traits.

c. Probability for colocalization means the posterior probability for a shared variant associated with both traits; conditional probability means the posterior probability for a shared variant associated with both traits conditional on the presence of a variant associated with the outcome.

d. The variant with the largest posterior probability for both traits is highlighted with a label.

Supplemental Table S1: Correlation matrix of genetic mimics of statins.

| Correlation coefficient | rs12916_C_T | rs17238484_T_G | rs5909_A_G | rs2303152_A_G | rs10066707_A_G | rs2006760_G_C |
|-------------------------|-------------|----------------|------------|---------------|----------------|---------------|
| rs12916_C_T             | 1.00        | 0.67           | 0.36       | 0.44          | 0.50           | 0.40          |
| rs17238484_T_G          | 0.67        | 1.00           | -0.23      | 0.64          | 0.54           | 0.24          |
| rs5909_A_G              | 0.36        | -0.23          | 1.00       | -0.13         | 0.21           | 0.45          |
| rs2303152_A_G           | 0.44        | 0.64           | -0.13      | 1.00          | 0.28           | 0.52          |
| rs10066707_A_G          | 0.50        | 0.54           | 0.21       | 0.28          | 1.00           | 0.48          |
| rs2006760_G_C           | 0.40        | 0.24           | 0.45       | 0.52          | 0.48           | 1.00          |

Supplemental Table S2: Correlation matrix of genetic mimics of PCSK9 inhibitors.

| Correlation coefficient | rs11206510_C_T | rs2479409_G_A | rs2149041_G_C | rs2479394_G_A | rs10888897_T_C | rs7552841_T_C | rs562556_G_A |
|-------------------------|----------------|---------------|---------------|---------------|----------------|---------------|--------------|
| rs11206510_C_T          | 1.00           | -0.20         | -0.16         | -0.30         | 0.24           | 0.12          | 0.15         |
| rs2479409_G_A           | -0.20          | 1.00          | 0.61          | 0.20          | -0.34          | -0.03         | -0.19        |
| rs2149041_G_C           | -0.16          | 0.61          | 1.00          | 0.25          | -0.28          | -0.07         | -0.18        |
| rs2479394_G_A           | -0.30          | 0.20          | 0.25          | 1.00          | -0.08          | -0.13         | -0.02        |
| rs10888897_T_C          | 0.24           | -0.34         | -0.28         | -0.08         | 1.00           | 0.08          | 0.33         |
| rs7552841_T_C           | 0.12           | -0.03         | -0.07         | -0.13         | 0.08           | 1.00          | -0.23        |
| rs562556_G_A            | 0.15           | -0.19         | -0.18         | -0.02         | 0.33           | -0.23         | 1.00         |



Supplemental Table S3: Correlation matrix of genetic mimics of ezetimibe.

| Correlation coefficient | rs217386_A_G | rs2073547_G_A | rs7791240_C_T | rs10234070_T_C | rs2300414_A_G |
|-------------------------|--------------|---------------|---------------|----------------|---------------|
| rs217386_A_G            | 1.00         | -0.38         | -0.25         | -0.20          | -0.22         |
| rs2073547_G_A           | -0.38        | 1.00          | 0.54          | 0.46           | 0.30          |
| rs7791240_C_T           | -0.25        | 0.54          | 1.00          | 0.15           | 0.60          |
| rs10234070_T_C          | -0.20        | 0.46          | 0.15          | 1.00           | 0.15          |
| rs2300414_A_G           | -0.22        | 0.30          | 0.60          | 0.15           | 1.00          |

Supplemental Table S4. SNP-specific estimates for genetically mimicked ASGR1 inhibitors, statins, PCSK9 inhibitors and ezetimibe on LDL-cholesterol (standard deviation) from GLGC excluding UK Biobank participants.

| Therapy          | SNP         | Effect | Other  | Effect allele | Beta    | SE     | P value   | F-statistic |
|------------------|-------------|--------|--------|---------------|---------|--------|-----------|-------------|
|                  |             | allele | allele | frequency     |         |        |           |             |
| ASGR1 inhibitors | rs186021206 | A      | G      | 0.005         | -0.2552 | 0.0134 | 6.3E-63   | 360.7       |
| ASGR1 inhibitors | rs55714927  | T      | C      | 0.187         | -0.0352 | 0.0022 | 2.1E-45   | 257.3       |
| ASGR1 inhibitors | rs150688657 | A      | G      | 0.103         | 0.0212  | 0.0027 | 9.9E-12   | 59.6        |
| Statins          | rs12916     | C      | T      | 0.403         | 0.0716  | 0.0017 | 1.94e-314 | 1849.1      |
| Statins          | rs10066707  | A      | G      | 0.374         | 0.0507  | 0.0018 | 3.4E-143  | 835.3       |
| Statins          | rs17238484  | T      | G      | 0.226         | 0.0606  | 0.0020 | 8.0E-164  | 957.4       |
| Statins          | rs2006760   | G      | C      | 0.203         | 0.0484  | 0.0021 | 4.3E-90   | 521.2       |
| Statins          | rs2303152   | A      | G      | 0.096         | 0.0381  | 0.0028 | 4.4E-34   | 190.6       |
| Statins          | rs5909      | A      | G      | 0.099         | 0.0553  | 0.0027 | 4.7E-72   | 414.7       |
| PCSK9 inhibitors | rs11206510  | C      | T      | 0.179         | -0.0658 | 0.0021 | 3.7E-160  | 935.7       |
| PCSK9 inhibitors | rs10888897  | T      | C      | 0.374         | -0.0393 | 0.0018 | 8.6E-87   | 501.7       |
| PCSK9 inhibitors | rs2149041   | G      | C      | 0.178         | 0.0496  | 0.0021 | 4.6E-93   | 538.8       |
| PCSK9 inhibitors | rs2479394   | G      | A      | 0.282         | 0.0288  | 0.0018 | 4.0E-45   | 255.7       |
| PCSK9 inhibitors | rs2479409   | G      | A      | 0.338         | 0.0475  | 0.0018 | 1.3E-124  | 725.4       |
| PCSK9 inhibitors | rs562556    | G      | A      | 0.173         | -0.0447 | 0.0022 | 1.8E-74   | 428.9       |
| PCSK9 inhibitors | rs7552841   | T      | C      | 0.364         | 0.0345  | 0.0020 | 2.8E-53   | 303.8       |
| Ezetimibe        | rs2073547   | G      | A      | 0.202         | 0.0427  | 0.0021 | 3.9E-71   | 409.2       |
| Ezetimibe        | rs10234070  | T      | C      | 0.122         | 0.0215  | 0.0026 | 1.1E-13   | 71.0        |
| Ezetimibe        | rs217386    | A      | G      | 0.419         | -0.0307 | 0.0017 | 1.5E-57   | 328.9       |
| Ezetimibe        | rs2300414   | A      | G      | 0.077         | 0.0248  | 0.0031 | 1.6E-12   | 64.2        |
| Ezetimibe        | rs7791240   | C      | T      | 0.098         | 0.0334  | 0.0028 | 3.7E-26   | 144.0       |

a. GLGC, Global Lipids Genetics Consortium; LDL, low-density lipoprotein.

Supplemental Table S5. Colocalization estimates for each posterior probability using prior probabilities 1.0E-4 for a variant associated with LDL-cholesterol, 1.0E-4 for a variant associated with the outcome, and different values for a variant associated with both traits in or near (+-100kb) the *ASGR1* gene.

| Outcome           | SNPs | Prior for both traits | H <sub>0</sub> | H <sub>1</sub> | H <sub>2</sub> | H <sub>3</sub> | H <sub>4</sub> | Conditional H <sub>4</sub> |
|-------------------|------|-----------------------|----------------|----------------|----------------|----------------|----------------|----------------------------|
| Lifespan          | 570  | 1.0E-05               | 1.3E-73        | 0.575          | 1.4E-75        | 0.006          | 0.419          | 0.986                      |
| Lifespan          | 570  | 1.0E-06               | 2.0E-73        | 0.923          | 2.2E-75        | 0.009          | 0.067          | 0.877                      |
| ApoB              | 916  | 1.0E-05               | 9.5E-158       | 4.3E-85        | 2.2E-76        | 4.8E-08        | >0.999         | >0.999                     |
| ApoB              | 916  | 1.0E-06               | 9.5E-157       | 4.3E-84        | 2.2E-75        | 4.8E-07        | >0.999         | >0.999                     |
| TG                | 916  | 1.0E-05               | 4.0E-86        | 1.8E-13        | 5.6E-76        | 0.002          | 0.998          | 0.998                      |
| TG                | 916  | 1.0E-06               | 4.0E-85        | 1.8E-12        | 5.5E-75        | 0.015          | 0.985          | 0.985                      |
| ApoA              | 916  | 1.0E-05               | 2.9E-74        | 0.132          | 1.4E-75        | 0.005          | 0.862          | 0.994                      |
| ApoA              | 916  | 1.0E-06               | 1.3E-73        | 0.591          | 6.1E-75        | 0.024          | 0.385          | 0.941                      |
| HDL-cholesterol   | 916  | 1.0E-05               | 4.4E-74        | 0.203          | 1.5E-74        | 0.070          | 0.726          | 0.912                      |
| HDL-cholesterol   | 916  | 1.0E-06               | 1.3E-73        | 0.587          | 4.5E-74        | 0.203          | 0.210          | 0.508                      |
| Total cholesterol | 916  | 1.0E-05               | 3.7E-116       | 1.7E-43        | 2.2E-76        | 4.8E-08        | >0.999         | >0.999                     |
| Total cholesterol | 916  | 1.0E-06               | 3.7E-115       | 1.7E-42        | 2.2E-75        | 4.8E-07        | >0.999         | >0.999                     |
| High cholesterol  | 916  | 1.0E-05               | 1.8E-79        | 8.2E-07        | 3.7E-75        | 0.016          | 0.984          | 0.984                      |
| High cholesterol  | 916  | 1.0E-06               | 1.6E-78        | 7.2E-06        | 3.2E-74        | 0.139          | 0.861          | 0.861                      |
| CAD               | 916  | 1.0E-05               | 1.5E-73        | 0.698          | 7.4E-76        | 0.003          | 0.299          | 0.990                      |
| CAD               | 916  | 1.0E-06               | 2.1E-73        | 0.955          | 1.0E-75        | 0.004          | 0.041          | 0.906                      |
| ALP               | 916  | 1.0E-05               | <4.9E-324      | <4.9E-324      | 2.2E-76        | 4.8E-08        | >0.999         | >0.999                     |
| ALP               | 916  | 1.0E-06               | <4.9E-324      | <4.9E-324      | 2.2E-75        | 4.8E-07        | >0.999         | >0.999                     |
| AST               | 916  | 1.0E-05               | 3.1E-83        | 1.4E-10        | 2.2E-73        | >0.999         | 1.7E-08        | 1.7E-08                    |
| AST               | 916  | 1.0E-06               | 3.1E-83        | 1.4E-10        | 2.2E-73        | >0.999         | 1.7E-09        | 1.7E-09                    |
| GGT               | 916  | 1.0E-05               | 7.9E-77        | 3.6E-04        | 3.4E-76        | 5.5E-04        | 0.999          | 0.999                      |
| GGT               | 916  | 1.0E-06               | 7.9E-76        | 0.004          | 3.3E-75        | 0.005          | 0.991          | 0.995                      |
| Albumin           | 916  | 1.0E-05               | 2.5E-96        | 1.2E-23        | 2.8E-76        | 2.9E-04        | >0.999         | >0.999                     |
| Albumin           | 916  | 1.0E-06               | 2.5E-95        | 1.2E-22        | 2.8E-75        | 0.003          | 0.997          | 0.997                      |
| HbA1c             | 916  | 1.0E-05               | 1.1E-73        | 0.522          | 1.8E-74        | 0.082          | 0.396          | 0.829                      |

|                      |     |         |           |           |         |         |         |         |
|----------------------|-----|---------|-----------|-----------|---------|---------|---------|---------|
| HbA1c                | 916 | 1.0E-06 | 1.8E-73   | 0.811     | 2.8E-74 | 0.127   | 0.062   | 0.326   |
| Haemoglobin          | 916 | 1.0E-05 | 2.3E-84   | 1.1E-11   | 5.4E-76 | 0.001   | 0.999   | 0.999   |
| Haemoglobin          | 916 | 1.0E-06 | 2.3E-83   | 1.0E-10   | 5.3E-75 | 0.015   | 0.985   | 0.985   |
| Haematocrit          | 916 | 1.0E-05 | 9.2E-81   | 4.2E-08   | 8.3E-76 | 0.003   | 0.997   | 0.997   |
| Haematocrit          | 916 | 1.0E-06 | 9.0E-80   | 4.1E-07   | 8.1E-75 | 0.027   | 0.973   | 0.973   |
| Red blood cell count | 916 | 1.0E-05 | 2.1E-75   | 0.009     | 8.7E-76 | 0.003   | 0.988   | 0.997   |
| Red blood cell count | 916 | 1.0E-06 | 1.9E-74   | 0.085     | 7.8E-75 | 0.027   | 0.888   | 0.971   |
| Reticulocyte count   | 916 | 1.0E-05 | 1.9E-75   | 0.009     | 3.1E-76 | 4.2E-04 | 0.991   | >0.999  |
| Reticulocyte count   | 916 | 1.0E-06 | 1.7E-74   | 0.079     | 2.9E-75 | 0.004   | 0.917   | 0.996   |
| Calcium              | 916 | 1.0E-05 | 7.1E-77   | 3.3E-04   | 5.8E-76 | 0.002   | 0.998   | 0.998   |
| Calcium              | 916 | 1.0E-06 | 7.0E-76   | 0.003     | 5.7E-75 | 0.016   | 0.980   | 0.983   |
| SHBG                 | 916 | 1.0E-05 | <4.9E-324 | <4.9E-324 | 2.2E-73 | >0.999  | 2.6E-73 | 2.6E-73 |
| SHBG                 | 916 | 1.0E-06 | <4.9E-324 | <4.9E-324 | 2.2E-73 | >0.999  | 2.6E-74 | 2.6E-74 |
| IGF-1                | 916 | 1.0E-05 | 2.6E-78   | 1.2E-05   | 7.9E-76 | 0.003   | 0.997   | 0.997   |
| IGF-1                | 916 | 1.0E-06 | 2.5E-77   | 1.1E-04   | 7.7E-75 | 0.026   | 0.974   | 0.974   |
| CRP                  | 916 | 1.0E-05 | 8.8E-86   | 4.1E-13   | 2.2E-76 | 2.1E-05 | >0.999  | >0.999  |
| CRP                  | 916 | 1.0E-06 | 8.8E-85   | 4.0E-12   | 2.2E-75 | 2.1E-04 | >0.999  | >0.999  |
| Testicular problems  | 916 | 1.0E-05 | 4.9E-74   | 0.224     | 3.6E-76 | 8.8E-04 | 0.775   | 0.999   |
| Testicular problems  | 916 | 1.0E-06 | 1.6E-73   | 0.741     | 1.2E-75 | 0.003   | 0.256   | 0.989   |

a. ALP, alkaline phosphatase; ApoA, apolipoprotein A; ApoB, apolipoprotein B; AST, aspartate aminotransferase; CAD, coronary artery disease; CRP, C-reactive protein; GGT, gamma glutamyltransferase; HbA1c, glycated haemoglobin; HDL, high-density lipoprotein; IGF-1, insulin-like growth factor 1; LDL, low-density lipoprotein; SHBG, sex hormone-binding globulin; TG, triglycerides.

b.  $H_0$ , no association with either trait;  $H_1$ , association with LDL-cholesterol only;  $H_2$ , association with the outcome only;  $H_3$ , associations of two independent variants and one for each trait;  $H_4$ , associations of one shared variant with both traits; conditional  $H_4$ , associations of one shared variant with both traits conditional on the presence of a variant associated with the outcome ( $H_4/(H_2+H_3+H_4)$ ).

Supplemental Table S6. Mendelian randomization inverse variance weighted estimates for genetically mimicked ASGR1 inhibitors (instrumented by rs55714927 and rs150688657) on significant outcomes.

| Sex     | Outcome           | Beta  | 95% CI       | <i>P</i> value |
|---------|-------------------|-------|--------------|----------------|
| Overall | ApoB              | -0.94 | -1.09, -0.79 | 1.1E-33        |
| Women   | ApoB              | -0.95 | -1.16, -0.74 | 1.7E-19        |
| Men     | ApoB              | -0.93 | -1.16, -0.71 | 5.8E-16        |
| Overall | TG                | -0.46 | -0.61, -0.31 | 1.5E-09        |
| Women   | TG                | -0.36 | -0.57, -0.16 | 5.6E-04        |
| Men     | TG                | -0.59 | -0.82, -0.36 | 3.5E-07        |
| Overall | ApoA              | -0.24 | -0.39, -0.10 | 1.3E-03        |
| Women   | ApoA              | -0.19 | -0.41, 0.03  | 9.7E-02        |
| Men     | ApoA              | -0.35 | -0.59, -0.12 | 3.4E-03        |
| Overall | HDL-cholesterol   | 0.00  | -0.15, 0.14  | 9.6E-01        |
| Women   | HDL-cholesterol   | 0.11  | -0.11, 0.33  | 3.1E-01        |
| Men     | HDL-cholesterol   | -0.13 | -0.37, 0.10  | 2.6E-01        |
| Overall | Total cholesterol | -0.77 | -0.92, -0.62 | 4.0E-24        |
| Women   | Total cholesterol | -0.78 | -0.99, -0.58 | 5.2E-14        |
| Men     | Total cholesterol | -0.78 | -1.00, -0.55 | 1.1E-11        |
| Overall | High cholesterol  | -1.26 | -1.71, -0.80 | 7.6E-08        |
| Women   | High cholesterol  | -1.07 | -1.76, -0.37 | 2.6E-03        |
| Men     | High cholesterol  | -1.42 | -2.04, -0.80 | 6.4E-06        |
| Overall | CAD               | -0.48 | -1.11, 0.16  | 1.4E-01        |
| Women   | CAD               | -0.32 | -1.52, 0.89  | 6.1E-01        |
| Men     | CAD               | -0.56 | -1.32, 0.21  | 1.6E-01        |
| Overall | ALP               | 2.60  | 2.45, 2.75   | 8.4E-257       |
| Women   | ALP               | 2.24  | 2.05, 2.44   | 2.9E-108       |
| Men     | ALP               | 3.09  | 2.86, 3.32   | 1.1E-157       |
| Overall | AST               | 0.06  | -0.08, 0.21  | 4.0E-01        |
| Women   | AST               | 0.09  | -0.11, 0.30  | 3.7E-01        |
| Men     | AST               | 0.04  | -0.19, 0.26  | 7.6E-01        |

|         |                      |       |              |          |
|---------|----------------------|-------|--------------|----------|
| Overall | GGT                  | 0.19  | 0.05, 0.34   | 7.4E-03  |
| Women   | GGT                  | 0.23  | 0.02, 0.43   | 3.1E-02  |
| Men     | GGT                  | 0.20  | -0.02, 0.43  | 7.9E-02  |
| Overall | Albumin              | -0.56 | -0.72, -0.41 | 2.7E-12  |
| Women   | Albumin              | -0.58 | -0.80, -0.36 | 2.4E-07  |
| Men     | Albumin              | -0.55 | -0.78, -0.32 | 2.6E-06  |
| Overall | HbA1c                | -0.52 | -0.67, -0.37 | 5.5E-12  |
| Women   | HbA1c                | -0.65 | -0.85, -0.45 | 1.2E-10  |
| Men     | HbA1c                | -0.38 | -0.60, -0.16 | 7.6E-04  |
| Overall | Haemoglobin          | 0.17  | 0.04, 0.29   | 7.5E-03  |
| Women   | Haemoglobin          | 0.12  | -0.09, 0.32  | 2.7E-01  |
| Men     | Haemoglobin          | 0.33  | 0.10, 0.55   | 4.2E-03  |
| Overall | Haematocrit          | 0.13  | 0.00, 0.25   | 4.3E-02  |
| Women   | Haematocrit          | 0.09  | -0.12, 0.30  | 4.0E-01  |
| Men     | Haematocrit          | 0.25  | 0.02, 0.47   | 3.2E-02  |
| Overall | Red blood cell count | 0.12  | -0.01, 0.25  | 7.0E-02  |
| Women   | Red blood cell count | 0.06  | -0.15, 0.27  | 5.7E-01  |
| Men     | Red blood cell count | 0.25  | 0.03, 0.47   | 2.7E-02  |
| Overall | Reticulocyte count   | 0.21  | 0.05, 0.36   | 8.3E-03  |
| Women   | Reticulocyte count   | 0.22  | 0.01, 0.43   | 4.0E-02  |
| Men     | Reticulocyte count   | 0.20  | -0.03, 0.42  | 9.0E-02  |
| Overall | Calcium              | -0.30 | -0.46, -0.14 | 2.5E-04  |
| Women   | Calcium              | -0.29 | -0.50, -0.07 | 1.0E-02  |
| Men     | Calcium              | -0.31 | -0.55, -0.08 | 8.7E-03  |
| Overall | SHBG                 | 2.58  | 2.44, 2.73   | 2.7E-266 |
| Women   | SHBG                 | 2.63  | 2.41, 2.85   | 1.3E-119 |
| Men     | SHBG                 | 3.17  | 2.94, 3.40   | 1.3E-164 |
| Overall | IGF-1                | 0.45  | 0.30, 0.60   | 4.3E-09  |
| Women   | IGF-1                | 0.32  | 0.12, 0.53   | 1.8E-03  |
| Men     | IGF-1                | 0.60  | 0.38, 0.83   | 1.0E-07  |

|         |                     |       |             |         |
|---------|---------------------|-------|-------------|---------|
| Overall | CRP                 | 0.37  | 0.22, 0.53  | 1.7E-06 |
| Women   | CRP                 | 0.29  | 0.09, 0.50  | 5.7E-03 |
| Men     | CRP                 | 0.47  | 0.25, 0.70  | 4.1E-05 |
| Men     | Testicular problems | -2.08 | -6.43, 2.27 | 3.5E-01 |

---

a. ALP, alkaline phosphatase; ApoA, apolipoprotein A; ApoB, apolipoprotein B; AST, aspartate aminotransferase; CAD, coronary artery disease; CI, confidence interval; CRP, C-reactive protein; GGT, gamma glutamyltransferase; HbA1c, glycated haemoglobin; HDL, high-density lipoprotein; IGF-1, insulin-like growth factor 1; LDL, low-density lipoprotein; SHBG, sex hormone-binding globulin; TG, triglycerides.

b. Estimates are expressed in standard deviation (SD) for continuous outcomes, and in log odds for binary outcomes per SD decrease in LDL-cholesterol.

Supplemental Table S7. Mendelian randomization inverse variance weighted estimates for genetically mimicked statins, PCSK9 inhibitors and ezetimibe (instrumented by all relevant SNPs along with their correlations) on significant outcomes identified for ASGR1 inhibitors.

| Therapy | Sex     | Outcome           | Beta  | 95% CI       | <i>P</i> value |
|---------|---------|-------------------|-------|--------------|----------------|
| Statins | Overall | ApoB              | -0.74 | -0.82, -0.66 | 1.8E-67        |
| Statins | Women   | ApoB              | -0.84 | -0.94, -0.75 | 1.5E-65        |
| Statins | Men     | ApoB              | -0.62 | -0.71, -0.53 | 1.9E-39        |
| Statins | Overall | TG                | -0.08 | -0.19, 0.02  | 1.3E-01        |
| Statins | Women   | TG                | -0.07 | -0.18, 0.05  | 2.5E-01        |
| Statins | Men     | TG                | -0.10 | -0.26, 0.05  | 1.9E-01        |
| Statins | Overall | ApoA              | 0.06  | -0.00, 0.12  | 6.7E-02        |
| Statins | Women   | ApoA              | 0.07  | -0.02, 0.16  | 1.4E-01        |
| Statins | Men     | ApoA              | 0.05  | -0.04, 0.15  | 2.9E-01        |
| Statins | Overall | HDL-cholesterol   | -0.10 | -0.17, -0.03 | 7.1E-03        |
| Statins | Women   | HDL-cholesterol   | -0.09 | -0.18, -0.00 | 4.7E-02        |
| Statins | Men     | HDL-cholesterol   | -0.12 | -0.22, -0.03 | 1.3E-02        |
| Statins | Overall | Total cholesterol | -0.78 | -0.88, -0.68 | 1.2E-52        |
| Statins | Women   | Total cholesterol | -0.89 | -1.01, -0.77 | 7.4E-48        |
| Statins | Men     | Total cholesterol | -0.68 | -0.78, -0.59 | 1.7E-45        |
| Statins | Overall | High cholesterol  | -1.32 | -1.52, -1.13 | 2.5E-40        |
| Statins | Women   | High cholesterol  | -1.58 | -1.90, -1.26 | 7.4E-22        |
| Statins | Men     | High cholesterol  | -1.13 | -1.40, -0.86 | 1.8E-16        |
| Statins | Overall | CAD               | -0.46 | -0.79, -0.14 | 5.4E-03        |
| Statins | Women   | CAD               | -0.62 | -1.16, -0.09 | 2.3E-02        |
| Statins | Men     | CAD               | -0.41 | -0.83, 0.02  | 5.9E-02        |
| Statins | Overall | ALP               | -0.08 | -0.14, -0.02 | 1.1E-02        |
| Statins | Women   | ALP               | -0.03 | -0.12, 0.05  | 4.4E-01        |
| Statins | Men     | ALP               | -0.14 | -0.23, -0.05 | 3.0E-03        |
| Statins | Overall | AST               | -0.10 | -0.21, 0.02  | 1.1E-01        |
| Statins | Women   | AST               | -0.09 | -0.20, 0.02  | 1.0E-01        |



|         |         |                      |       |              |         |
|---------|---------|----------------------|-------|--------------|---------|
| Statins | Men     | AST                  | -0.11 | -0.26, 0.04  | 1.5E-01 |
| Statins | Overall | GGT                  | -0.01 | -0.11, 0.10  | 9.2E-01 |
| Statins | Women   | GGT                  | 0.02  | -0.16, 0.20  | 8.3E-01 |
| Statins | Men     | GGT                  | -0.04 | -0.13, 0.05  | 3.9E-01 |
| Statins | Overall | Albumin              | -0.04 | -0.11, 0.02  | 2.1E-01 |
| Statins | Women   | Albumin              | -0.07 | -0.16, 0.02  | 1.2E-01 |
| Statins | Men     | Albumin              | -0.01 | -0.10, 0.09  | 9.2E-01 |
| Statins | Overall | HbA1c                | 0.16  | 0.09, 0.22   | 2.0E-06 |
| Statins | Women   | HbA1c                | 0.16  | 0.06, 0.26   | 2.2E-03 |
| Statins | Men     | HbA1c                | 0.15  | 0.06, 0.24   | 1.2E-03 |
| Statins | Overall | Haemoglobin          | -0.06 | -0.12, -0.00 | 4.9E-02 |
| Statins | Women   | Haemoglobin          | -0.07 | -0.16, 0.02  | 1.1E-01 |
| Statins | Men     | Haemoglobin          | -0.08 | -0.18, 0.02  | 1.1E-01 |
| Statins | Overall | Haematocrit          | -0.03 | -0.10, 0.04  | 4.4E-01 |
| Statins | Women   | Haematocrit          | -0.05 | -0.14, 0.04  | 3.1E-01 |
| Statins | Men     | Haematocrit          | -0.01 | -0.11, 0.08  | 7.9E-01 |
| Statins | Overall | Red blood cell count | -0.05 | -0.10, 0.01  | 7.6E-02 |
| Statins | Women   | Red blood cell count | -0.08 | -0.18, 0.03  | 1.5E-01 |
| Statins | Men     | Red blood cell count | -0.04 | -0.13, 0.05  | 4.3E-01 |
| Statins | Overall | Reticulocyte count   | 0.05  | -0.03, 0.12  | 2.2E-01 |
| Statins | Women   | Reticulocyte count   | 0.05  | -0.06, 0.15  | 3.8E-01 |
| Statins | Men     | Reticulocyte count   | 0.05  | -0.04, 0.14  | 2.9E-01 |
| Statins | Overall | Calcium              | -0.18 | -0.25, -0.12 | 4.9E-08 |
| Statins | Women   | Calcium              | -0.25 | -0.34, -0.16 | 3.7E-08 |
| Statins | Men     | Calcium              | -0.10 | -0.19, -0.00 | 4.3E-02 |
| Statins | Overall | SHBG                 | -0.13 | -0.19, -0.07 | 1.4E-05 |
| Statins | Women   | SHBG                 | -0.22 | -0.32, -0.11 | 7.8E-05 |
| Statins | Men     | SHBG                 | -0.06 | -0.15, 0.03  | 2.1E-01 |
| Statins | Overall | IGF-1                | -0.08 | -0.14, -0.02 | 1.4E-02 |
| Statins | Women   | IGF-1                | -0.04 | -0.13, 0.04  | 2.9E-01 |

|                  |         |                     |       |              |         |
|------------------|---------|---------------------|-------|--------------|---------|
| Statins          | Men     | IGF-1               | -0.12 | -0.21, -0.03 | 1.1E-02 |
| Statins          | Overall | CRP                 | -0.08 | -0.16, 0.00  | 6.2E-02 |
| Statins          | Women   | CRP                 | -0.03 | -0.17, 0.12  | 7.0E-01 |
| Statins          | Men     | CRP                 | -0.13 | -0.23, -0.04 | 4.3E-03 |
| Statins          | Men     | Testicular problems | -0.35 | -1.99, 1.28  | 6.7E-01 |
| PCSK9 inhibitors | Overall | ApoB                | -0.73 | -0.83, -0.63 | 1.0E-46 |
| PCSK9 inhibitors | Women   | ApoB                | -0.75 | -0.83, -0.67 | 3.0E-72 |
| PCSK9 inhibitors | Men     | ApoB                | -0.70 | -0.85, -0.56 | 1.3E-21 |
| PCSK9 inhibitors | Overall | TG                  | 0.02  | -0.07, 0.11  | 5.9E-01 |
| PCSK9 inhibitors | Women   | TG                  | -0.03 | -0.15, 0.08  | 5.8E-01 |
| PCSK9 inhibitors | Men     | TG                  | 0.09  | -0.04, 0.22  | 1.7E-01 |
| PCSK9 inhibitors | Overall | ApoA                | 0.12  | 0.06, 0.18   | 4.9E-05 |
| PCSK9 inhibitors | Women   | ApoA                | 0.12  | 0.03, 0.20   | 8.9E-03 |
| PCSK9 inhibitors | Men     | ApoA                | 0.15  | 0.05, 0.24   | 3.4E-03 |
| PCSK9 inhibitors | Overall | HDL-cholesterol     | -0.01 | -0.07, 0.05  | 6.8E-01 |
| PCSK9 inhibitors | Women   | HDL-cholesterol     | 0.01  | -0.08, 0.10  | 8.1E-01 |
| PCSK9 inhibitors | Men     | HDL-cholesterol     | -0.04 | -0.15, 0.07  | 4.4E-01 |
| PCSK9 inhibitors | Overall | Total cholesterol   | -0.65 | -0.74, -0.56 | 2.4E-49 |
| PCSK9 inhibitors | Women   | Total cholesterol   | -0.68 | -0.76, -0.60 | 8.7E-63 |
| PCSK9 inhibitors | Men     | Total cholesterol   | -0.64 | -0.77, -0.51 | 8.7E-22 |
| PCSK9 inhibitors | Overall | High cholesterol    | -1.15 | -1.34, -0.96 | 2.1E-32 |
| PCSK9 inhibitors | Women   | High cholesterol    | -1.26 | -1.53, -0.99 | 6.5E-20 |
| PCSK9 inhibitors | Men     | High cholesterol    | -1.07 | -1.31, -0.83 | 1.6E-18 |
| PCSK9 inhibitors | Overall | CAD                 | -0.52 | -0.82, -0.23 | 5.3E-04 |
| PCSK9 inhibitors | Women   | CAD                 | -0.36 | -0.83, 0.11  | 1.4E-01 |
| PCSK9 inhibitors | Men     | CAD                 | -0.61 | -0.96, -0.25 | 8.9E-04 |
| PCSK9 inhibitors | Overall | ALP                 | 0.07  | 0.01, 0.12   | 2.6E-02 |
| PCSK9 inhibitors | Women   | ALP                 | 0.08  | -0.00, 0.15  | 5.5E-02 |
| PCSK9 inhibitors | Men     | ALP                 | 0.05  | -0.04, 0.15  | 2.7E-01 |
| PCSK9 inhibitors | Overall | AST                 | 0.06  | -0.01, 0.13  | 9.7E-02 |

|                  |         |                      |       |             |         |
|------------------|---------|----------------------|-------|-------------|---------|
| PCSK9 inhibitors | Women   | AST                  | 0.06  | -0.05, 0.17 | 3.0E-01 |
| PCSK9 inhibitors | Men     | AST                  | 0.06  | -0.03, 0.16 | 2.0E-01 |
| PCSK9 inhibitors | Overall | GGT                  | 0.09  | 0.04, 0.15  | 1.0E-03 |
| PCSK9 inhibitors | Women   | GGT                  | 0.09  | 0.01, 0.17  | 2.4E-02 |
| PCSK9 inhibitors | Men     | GGT                  | 0.11  | -0.01, 0.23 | 8.1E-02 |
| PCSK9 inhibitors | Overall | Albumin              | 0.04  | -0.06, 0.13 | 4.5E-01 |
| PCSK9 inhibitors | Women   | Albumin              | 0.06  | -0.04, 0.15 | 2.3E-01 |
| PCSK9 inhibitors | Men     | Albumin              | 0.01  | -0.09, 0.12 | 8.1E-01 |
| PCSK9 inhibitors | Overall | HbA1c                | -0.02 | -0.07, 0.04 | 5.8E-01 |
| PCSK9 inhibitors | Women   | HbA1c                | -0.04 | -0.11, 0.04 | 3.8E-01 |
| PCSK9 inhibitors | Men     | HbA1c                | 0.00  | -0.08, 0.09 | 9.4E-01 |
| PCSK9 inhibitors | Overall | Haemoglobin          | 0.11  | 0.06, 0.16  | 6.8E-06 |
| PCSK9 inhibitors | Women   | Haemoglobin          | 0.08  | -0.00, 0.16 | 5.7E-02 |
| PCSK9 inhibitors | Men     | Haemoglobin          | 0.21  | 0.12, 0.30  | 5.2E-06 |
| PCSK9 inhibitors | Overall | Haematocrit          | 0.09  | 0.04, 0.14  | 2.1E-04 |
| PCSK9 inhibitors | Women   | Haematocrit          | 0.06  | -0.02, 0.14 | 1.6E-01 |
| PCSK9 inhibitors | Men     | Haematocrit          | 0.18  | 0.09, 0.27  | 8.2E-05 |
| PCSK9 inhibitors | Overall | Red blood cell count | 0.09  | 0.04, 0.14  | 9.5E-04 |
| PCSK9 inhibitors | Women   | Red blood cell count | 0.05  | -0.03, 0.13 | 2.4E-01 |
| PCSK9 inhibitors | Men     | Red blood cell count | 0.16  | 0.05, 0.27  | 6.2E-03 |
| PCSK9 inhibitors | Overall | Reticulocyte count   | 0.14  | 0.08, 0.20  | 4.9E-06 |
| PCSK9 inhibitors | Women   | Reticulocyte count   | 0.14  | 0.05, 0.22  | 1.4E-03 |
| PCSK9 inhibitors | Men     | Reticulocyte count   | 0.15  | 0.05, 0.25  | 3.7E-03 |
| PCSK9 inhibitors | Overall | Calcium              | -0.02 | -0.09, 0.05 | 6.3E-01 |
| PCSK9 inhibitors | Women   | Calcium              | -0.03 | -0.12, 0.05 | 4.5E-01 |
| PCSK9 inhibitors | Men     | Calcium              | 0.00  | -0.12, 0.11 | 9.9E-01 |
| PCSK9 inhibitors | Overall | SHBG                 | 0.06  | 0.01, 0.12  | 3.1E-02 |
| PCSK9 inhibitors | Women   | SHBG                 | 0.06  | -0.02, 0.15 | 1.6E-01 |
| PCSK9 inhibitors | Men     | SHBG                 | 0.08  | -0.06, 0.21 | 2.6E-01 |
| PCSK9 inhibitors | Overall | IGF-1                | -0.01 | -0.08, 0.06 | 7.5E-01 |

|                  |         |                     |       |              |         |
|------------------|---------|---------------------|-------|--------------|---------|
| PCSK9 inhibitors | Women   | IGF-1               | 0.02  | -0.06, 0.10  | 7.0E-01 |
| PCSK9 inhibitors | Men     | IGF-1               | -0.04 | -0.14, 0.05  | 3.6E-01 |
| PCSK9 inhibitors | Overall | CRP                 | 0.08  | 0.00, 0.16   | 4.9E-02 |
| PCSK9 inhibitors | Women   | CRP                 | 0.10  | -0.00, 0.20  | 5.9E-02 |
| PCSK9 inhibitors | Men     | CRP                 | 0.06  | -0.03, 0.15  | 2.3E-01 |
| PCSK9 inhibitors | Men     | Testicular problems | -0.40 | -2.00, 1.21  | 6.3E-01 |
| Ezetimibe        | Overall | ApoB                | -0.67 | -0.81, -0.54 | 5.6E-23 |
| Ezetimibe        | Women   | ApoB                | -0.81 | -0.97, -0.64 | 5.0E-22 |
| Ezetimibe        | Men     | ApoB                | -0.53 | -0.74, -0.31 | 2.6E-06 |
| Ezetimibe        | Overall | TG                  | -0.14 | -0.33, 0.05  | 1.5E-01 |
| Ezetimibe        | Women   | TG                  | -0.15 | -0.50, 0.20  | 4.0E-01 |
| Ezetimibe        | Men     | TG                  | -0.13 | -0.40, 0.13  | 3.2E-01 |
| Ezetimibe        | Overall | ApoA                | 0.16  | 0.04, 0.28   | 7.5E-03 |
| Ezetimibe        | Women   | ApoA                | 0.09  | -0.09, 0.28  | 3.3E-01 |
| Ezetimibe        | Men     | ApoA                | 0.27  | 0.08, 0.46   | 4.9E-03 |
| Ezetimibe        | Overall | HDL-cholesterol     | 0.13  | -0.00, 0.25  | 5.0E-02 |
| Ezetimibe        | Women   | HDL-cholesterol     | 0.09  | -0.16, 0.33  | 4.9E-01 |
| Ezetimibe        | Men     | HDL-cholesterol     | 0.20  | 0.01, 0.39   | 3.5E-02 |
| Ezetimibe        | Overall | Total cholesterol   | -0.69 | -0.80, -0.57 | 5.6E-30 |
| Ezetimibe        | Women   | Total cholesterol   | -0.82 | -0.98, -0.66 | 4.4E-23 |
| Ezetimibe        | Men     | Total cholesterol   | -0.56 | -0.75, -0.36 | 1.6E-08 |
| Ezetimibe        | Overall | High cholesterol    | -1.55 | -1.91, -1.20 | 4.9E-18 |
| Ezetimibe        | Women   | High cholesterol    | -1.55 | -2.09, -1.02 | 1.2E-08 |
| Ezetimibe        | Men     | High cholesterol    | -1.58 | -2.05, -1.10 | 6.7E-11 |
| Ezetimibe        | Overall | CAD                 | -0.85 | -1.70, 0.00  | 5.1E-02 |
| Ezetimibe        | Women   | CAD                 | -0.88 | -2.18, 0.42  | 1.9E-01 |
| Ezetimibe        | Men     | CAD                 | -0.87 | -1.87, 0.13  | 8.8E-02 |
| Ezetimibe        | Overall | ALP                 | -0.16 | -0.31, -0.01 | 3.8E-02 |
| Ezetimibe        | Women   | ALP                 | -0.19 | -0.35, -0.04 | 1.6E-02 |
| Ezetimibe        | Men     | ALP                 | -0.11 | -0.35, 0.13  | 3.7E-01 |

|           |         |                      |       |              |         |
|-----------|---------|----------------------|-------|--------------|---------|
| Ezetimibe | Overall | AST                  | -0.04 | -0.20, 0.12  | 6.2E-01 |
| Ezetimibe | Women   | AST                  | -0.01 | -0.17, 0.16  | 9.3E-01 |
| Ezetimibe | Men     | AST                  | -0.08 | -0.26, 0.10  | 3.6E-01 |
| Ezetimibe | Overall | GGT                  | -0.16 | -0.36, 0.04  | 1.3E-01 |
| Ezetimibe | Women   | GGT                  | -0.26 | -0.46, -0.05 | 1.4E-02 |
| Ezetimibe | Men     | GGT                  | -0.06 | -0.31, 0.19  | 6.4E-01 |
| Ezetimibe | Overall | Albumin              | -0.06 | -0.24, 0.12  | 5.3E-01 |
| Ezetimibe | Women   | Albumin              | -0.05 | -0.22, 0.13  | 6.1E-01 |
| Ezetimibe | Men     | Albumin              | -0.07 | -0.37, 0.23  | 6.3E-01 |
| Ezetimibe | Overall | HbA1c                | 0.35  | 0.13, 0.58   | 2.3E-03 |
| Ezetimibe | Women   | HbA1c                | 0.36  | 0.08, 0.64   | 1.1E-02 |
| Ezetimibe | Men     | HbA1c                | 0.34  | 0.05, 0.63   | 2.0E-02 |
| Ezetimibe | Overall | Haemoglobin          | 0.00  | -0.11, 0.11  | 9.7E-01 |
| Ezetimibe | Women   | Haemoglobin          | -0.10 | -0.26, 0.07  | 2.5E-01 |
| Ezetimibe | Men     | Haemoglobin          | 0.10  | -0.19, 0.39  | 5.1E-01 |
| Ezetimibe | Overall | Haematocrit          | 0.05  | -0.05, 0.15  | 3.7E-01 |
| Ezetimibe | Women   | Haematocrit          | -0.02 | -0.19, 0.14  | 7.9E-01 |
| Ezetimibe | Men     | Haematocrit          | 0.15  | -0.14, 0.45  | 3.1E-01 |
| Ezetimibe | Overall | Red blood cell count | 0.07  | -0.08, 0.23  | 3.4E-01 |
| Ezetimibe | Women   | Red blood cell count | 0.05  | -0.16, 0.26  | 6.3E-01 |
| Ezetimibe | Men     | Red blood cell count | 0.13  | -0.10, 0.36  | 2.6E-01 |
| Ezetimibe | Overall | Reticulocyte count   | 0.12  | -0.10, 0.34  | 2.9E-01 |
| Ezetimibe | Women   | Reticulocyte count   | 0.14  | -0.12, 0.40  | 3.0E-01 |
| Ezetimibe | Men     | Reticulocyte count   | 0.09  | -0.13, 0.32  | 4.1E-01 |
| Ezetimibe | Overall | Calcium              | -0.05 | -0.28, 0.17  | 6.3E-01 |
| Ezetimibe | Women   | Calcium              | -0.15 | -0.37, 0.07  | 1.8E-01 |
| Ezetimibe | Men     | Calcium              | 0.06  | -0.19, 0.31  | 6.3E-01 |
| Ezetimibe | Overall | SHBG                 | -0.07 | -0.30, 0.15  | 5.2E-01 |
| Ezetimibe | Women   | SHBG                 | -0.08 | -0.30, 0.14  | 4.9E-01 |
| Ezetimibe | Men     | SHBG                 | -0.09 | -0.41, 0.23  | 5.9E-01 |

|           |         |                     |       |             |         |
|-----------|---------|---------------------|-------|-------------|---------|
| Ezetimibe | Overall | IGF-1               | 0.15  | -0.06, 0.37 | 1.6E-01 |
| Ezetimibe | Women   | IGF-1               | 0.18  | -0.04, 0.41 | 1.1E-01 |
| Ezetimibe | Men     | IGF-1               | 0.12  | -0.13, 0.36 | 3.6E-01 |
| Ezetimibe | Overall | CRP                 | -0.04 | -0.35, 0.26 | 7.7E-01 |
| Ezetimibe | Women   | CRP                 | -0.09 | -0.57, 0.38 | 7.0E-01 |
| Ezetimibe | Men     | CRP                 | 0.01  | -0.16, 0.19 | 8.7E-01 |
| Ezetimibe | Men     | Testicular problems | 3.17  | -2.35, 8.68 | 2.6E-01 |

a. ALP, alkaline phosphatase; ApoA, apolipoprotein A; ApoB, apolipoprotein B; AST, aspartate aminotransferase; CAD, coronary artery disease; CI, confidence interval; CRP, C-reactive protein; GGT, gamma glutamyltransferase; HbA1c, glycated haemoglobin; HDL, high-density lipoprotein; IGF-1, insulin-like growth factor 1; LDL, low-density lipoprotein; SHBG, sex hormone-binding globulin; TG, triglycerides.

b. Estimates are expressed in standard deviation (SD) for continuous outcomes, and in log odds for binary outcomes per SD decrease in LDL-cholesterol.

Supplemental Table S8. Mendelian randomization inverse variance weighted estimates for genetically mimicked ASGR1 inhibitors on significant outcomes in replication studies.

| Outcome              | Consortium        | PMID/Source | Overlap with UK Biobank | Population              | Number (cases/controls) | SNPs | Beta   | 95% CI         | <i>P</i> value |
|----------------------|-------------------|-------------|-------------------------|-------------------------|-------------------------|------|--------|----------------|----------------|
| ApoB                 | Meta-analysis     | 27005778    | No                      | European                | 20690                   | 2    | -0.68  | -1.37 to 0.02  | 5.6E-02        |
| TG                   | GLGC              | 34887591    | No                      | European                | 864240                  | 1    | -0.26  | -0.37 to -0.16 | 3.0E-07        |
| ApoA1                | Meta-analysis     | 27005778    | No                      | European                | 20687                   | 2    | -0.23  | -0.94 to 0.49  | 5.3E-01        |
| HDL-cholesterol      | GLGC              | 34887591    | No                      | European                | 888227                  | 1    | 0.25   | 0.15 to 0.35   | 8.5E-07        |
| Total cholesterol    | GLGC              | 34887591    | No                      | European                | 930672                  | 1    | -0.88  | -0.98 to -0.78 | 1.1E-70        |
| CAD                  | CARDIoGRAMplusC4D | 26343387    | No                      | Mixed (mainly European) | 60801/123504            | 2    | -0.93  | -1.65 to -0.22 | 1.0E-02        |
| ALP                  | Biobank Japan     | 34594039    | No                      | East Asian              | 118886                  | 1    | 2.94   | 2.62 to 3.25   | 6.3E-74        |
| AST                  | Biobank Japan     | 34594039    | No                      | East Asian              | 150068                  | 1    | 0.60   | 0.31 to 0.88   | 3.9E-05        |
| GGT                  | Biobank Japan     | 34594039    | No                      | East Asian              | 133471                  | 1    | 0.56   | 0.28 to 0.85   | 1.0E-04        |
| Albumin              | Biobank Japan     | 34594039    | No                      | East Asian              | 120539                  | 1    | -0.26  | -0.57 to 0.04  | 9.3E-02        |
| HbA1c                | MAGIC             | 34059833    | No                      | European                | 146806                  | 1    | -0.002 | -0.16 to 0.16  | 9.8E-01        |
| Haemoglobin          | Meta-analysis     | 32888493    | Yes                     | European                | 563946                  | 1    | 0.35   | 0.25 to 0.45   | 7.2E-12        |
| Haematocrit          | Meta-analysis     | 32888493    | Yes                     | European                | 562259                  | 1    | 0.36   | 0.26 to 0.46   | 4.9E-12        |
| Red blood cell count | Meta-analysis     | 32888493    | Yes                     | European                | 545203                  | 1    | 0.24   | 0.14 to 0.34   | 2.3E-06        |

|                    |                                  |          |     |            |        |   |      |               |         |
|--------------------|----------------------------------|----------|-----|------------|--------|---|------|---------------|---------|
| Reticulocyte count | UK Biobank+UK<br>BiLEVE+INTERVAL | 27863252 | Yes | European   | 170641 | 1 | 0.17 | -0.02 to 0.35 | 7.4E-02 |
| Calcium            | Biobank Japan                    | 34594039 | No  | East Asian | 83980  | 1 | 0.22 | -0.17 to 0.60 | 2.7E-01 |
| CRP                | UK Biobank+CHARGE                | 35459240 | Yes | European   | 575531 | 2 | 0.35 | 0.22 to 0.49  | 4.1E-07 |

a. ALP, alkaline phosphatase; ApoA, apolipoprotein A; ApoB, apolipoprotein B; AST, aspartate aminotransferase; CAD, coronary artery disease; CARDIoGRAMplusC4D, Coronary ARtery Disease Genome wide Replication and Meta-analysis plus The Coronary Artery Disease Genetics; CHARGE, Cohorts for Heart and Aging Research in Genomic Epidemiology consortia; CI, confidence interval; CRP, C-reactive protein; GGT, gamma glutamyltransferase; GLGC, Global Lipids Genetics Consortium; HbA1c, glycated haemoglobin; HDL, high-density lipoprotein; MAGIC, the Meta-Analyses of Glucose and Insulin-related traits Consortium; OR, odds ratio; SD, standard deviation; TG, triglycerides; UK BiLEVE, UK Biobank Lung Exome Variant Evaluation.

b. One SNP for ASGR1 inhibitors was rs186021206, and two independent SNPs were rs55714927 and rs150688657 in people of European ancestry; one SNP for ASGR1 inhibitors was rs55714927 in East Asians.

c. Estimates are expressed in percentage for HbA1c, in SD for other continuous outcomes, and in log odds for binary outcomes per SD decrease in LDL-cholesterol.



Supplemental Note: R code for Mendelian randomization analysis, phenome-wide association analysis and colocalization analysis.

```
#####Mendelian randomization analysis#####
```

```
library(TwoSampleMR)
```

```
library(MendelianRandomization)
```

```
#Harmonise exposure data and outcome data#
```

```
exposure<-format_data(data_exp,type="exposure",snp_col = 'rsid',beta_col = "beta",  
                      se_col = "se",effect_allele_col = "alt",other_allele_col = "ref",  
                      eaf_col = "AF",pval_col = "pval")
```

```
outcome<-format_data(data_out,type="outcome",snp_col = 'rsid',beta_col = "beta",  
                    se_col = "se",effect_allele_col = "alt",other_allele_col = "ref",  
                    eaf_col = "AF",pval_col = "pval")
```

```
data<-harmonise_data(exposure,outcome,action=2)
```

```
data2<-data[data$mr_keep%in% TRUE,]
```

```
#Inverse variance weighted estimates for independent genetic variants#
```

```
mrinput<-dat_to_MRInput(data2)
```

```
MendelianRandomization::mr_ivw(mrinput[[1]])
```

```
#Inverse variance weighted estimates for correlated genetic variants along with correlations#
```

```
mrinput<-dat_to_MRInput(data2,get_correlations = TRUE)
```

```
MendelianRandomization::mr_ivw(mrinput[[1]],correl = TRUE)
```

```
#####Phenome-wide association analysis#####
```

```
#Extract genetic associations from the UK Biobank (Neale lab)#
```

```
get_associations <- function(data, rows, snp) {
```

```
  for(i in rows) {
```

```
    # Create temp directory and temp file
```

```
    temp_dir <- tempdir(check = TRUE)
```

```
    temp_bgz <- tempfile(fileext = ".bgz")
```

```
    # Download data file for row i
```

```
    download(url = data$url[i], destfile = temp_bgz, mode = "wb")
```

```
    # Extract data for the SNP of interest
```

```
    temp_data1 <- read_tsv(temp_bgz,col_select = c("variant","beta","se",'pval'))
```

```
    temp_data2<-temp_data1[temp_data1$variant %in% snp,]
```

```
    temp_data<-transform(temp_data2,x=i,phenotype_code=data$phenotype_code[i])
```

```
    # Export the data to CSV file
```

```
    write_excel_csv(temp_data, str_c("extract_phenotypes_", deparse(substitute(data)), ".csv"), append = TRUE)
```

```
    # Delete the temp file and directory
```

```
    unlink(temp_bgz)
```

```
    unlink(temp_dir, recursive = TRUE)
```

```
    # Garbage collection to clear memory at the end of the loop
```

```

gc()

}

}

#####Colocalization analysis#####

library(coloc)

coloc_exp<-data_exp[,c("snp","position","beta","varbeta")]

coloc_out<-data_out[,c("snp","position","beta","varbeta")]

#Format data for quantitative traits#

coloc_exp<-as.list(coloc_exp)

coloc_exp$type<-"quant"

coloc_exp$sdY<-sdY #sdY is the population standard deviation of the trait#

check_dataset(coloc_exp)

#Format data for binary traits#

coloc_out <-as.list(coloc_out)

coloc_out $type<-"cc"

coloc_out $s<-s #s is the proportion of cases in the sample#

check_dataset(coloc_out)

#Colocalization analyses using prior probabilities 1.0e-4 for a variant associated with the exposure, 1.0e-4 for a
variant associated with the outcome, and 1.0e-5 for a variant associated with both traits#

```

```
coloc.abf(coloc_exp, coloc_out, MAF = NULL, p1 = 1e-04, p2 = 1e-04, p12 = 1e-5)
```

```
#Colocalization analyses using prior probabilities 1.0e-4 for a variant associated with the exposure, 1.0e-4 for a  
variant associated with the outcome, and 1.0e-6 for a variant associated with both traits#
```

```
coloc.abf(coloc_exp, coloc_out, MAF = NULL, p1 = 1e-04, p2 = 1e-04, p12 = 1e-6)
```
